# Supplementary material
Source: HighWire-hosted journal article supplement (https://bmjopen.bmj.com/content/12/4/e055206)
Supplement: inline-supplementary-material-1 [file inline-supplementary-material-1.pdf]

## SUPPLEMENTARY MATERIALS

**Supplementary Figure 1.** Difference in CO<sub>2</sub> parts per million (ppm) over the sampling period compared to start time, by type of sampling space

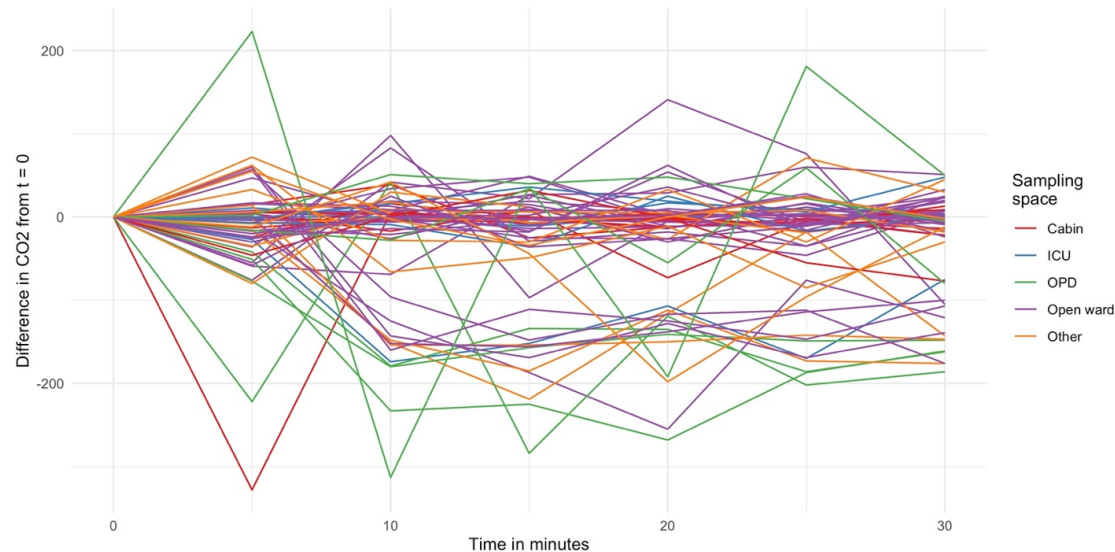

Difference in CO<sub>2</sub> parts per million (ppm) measurements from a given type of sampling space across 5-minute time intervals. Cabins are denoted with red lines; ICUs are represented by blue lines; green lines are OPDs; purple lines are private rooms; and orange lines represent other spaces.

**Supplementary Figure 2.** Elasticity of architectural and ventilation features on absolute ventilation ( $\log_{10}$  L/s) of sampling space (95% confidence interval included)

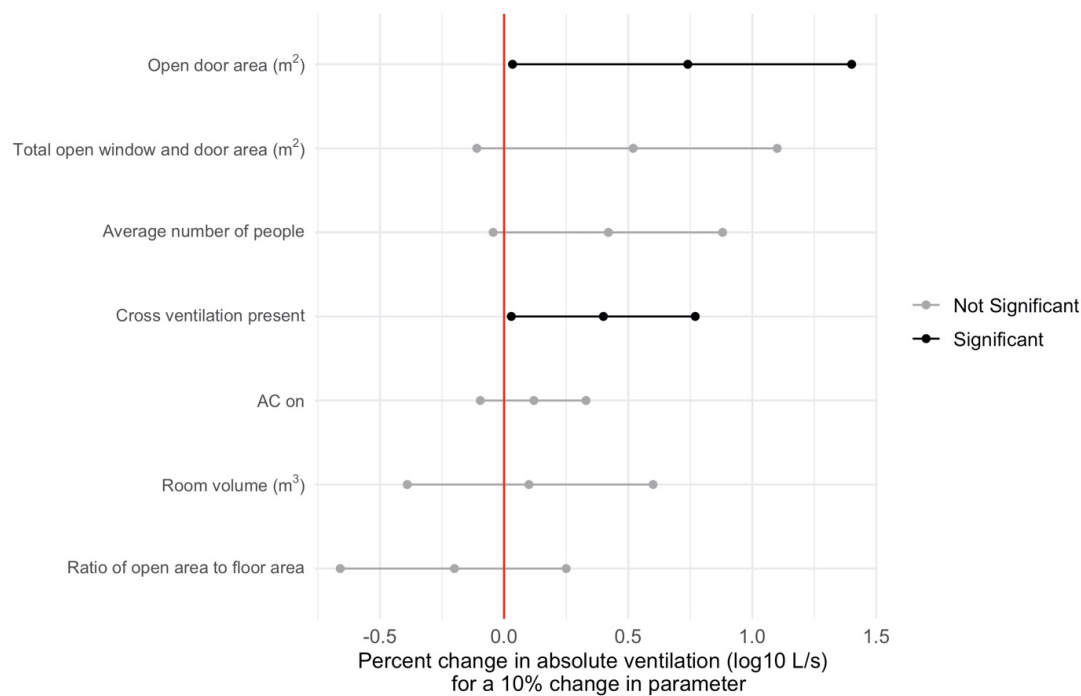

Impact of a 10% change of a given parameter on absolute ventilation. Black lines represent variables that reach statistical significance. Gray lines represent parameters that were not significant.

**Supplementary Figure 3.** Risk of SARS-CoV-2 infection over 40-hour time period by open door area and cross ventilation

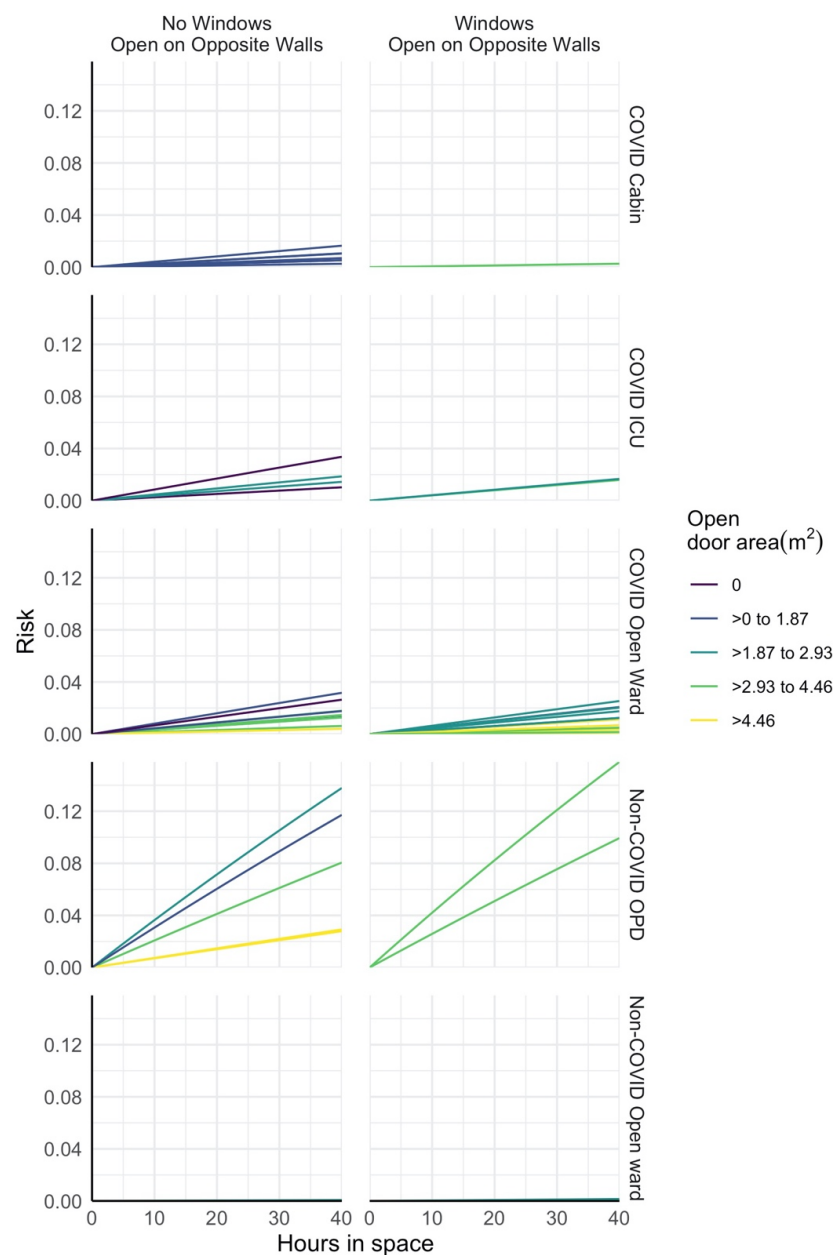

Cumulative risk of SARS-CoV-2 infection over 40 hours, stratified by open door area (m<sup>2</sup>) and cross ventilation. Each line represents the median risk over 1,000 simulations. Categories represent rooms with  $x$  m<sup>2</sup> of total open area and quartiles above 0.
